# Supplementary material for: Identification of Genetic Diversity, Pyrrocidine-Producing Strains and Transmission Modes of Endophytic Sarocladium zeae Fungi from Zea Crops
Source: MDPI journal article supplement (doi:10.3390/microorganisms10071415), 2022-07-14
Supplement: s1 [file s1]

## Supplementary Materials

### Identification of Genetic Diversity, Pyrrocidine-Producing Strains and Transmission Modes of Endophytic *Sarocladium zeae* Fungi from *Zea* Crops

Qianhe Liu, Linda J. Johnson, Emma R. Applegate, Karoline Arfmann, Ruy Jauregui, Anna Larking, Wade J. Mace, Paul Maclean, Thomas Walker, Richard D. Johnson\*

AgResearch Limited, Grasslands Research Centre, Palmerston North, New Zealand

\* Correspondence: [Richard.Johnson@agresearch.co.nz](mailto:Richard.Johnson@agresearch.co.nz)

Suppl. Figure S1. Histogram of MAF

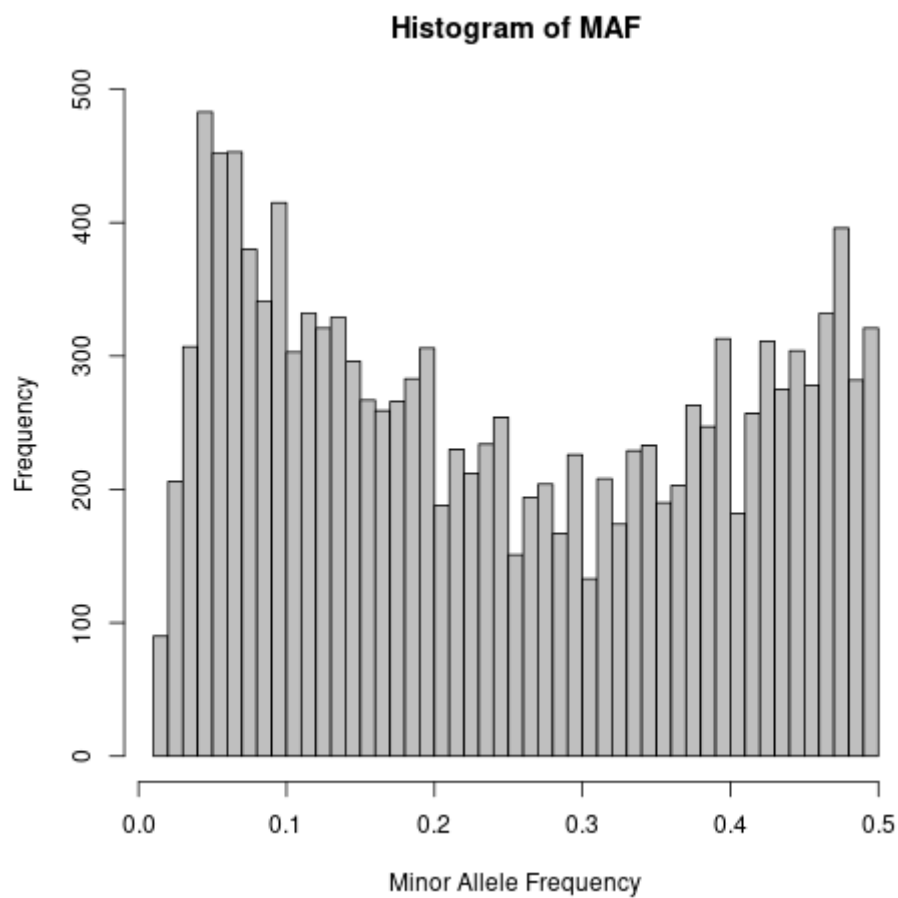

**Suppl. Figure S2.** Histogram of mean SNP depth

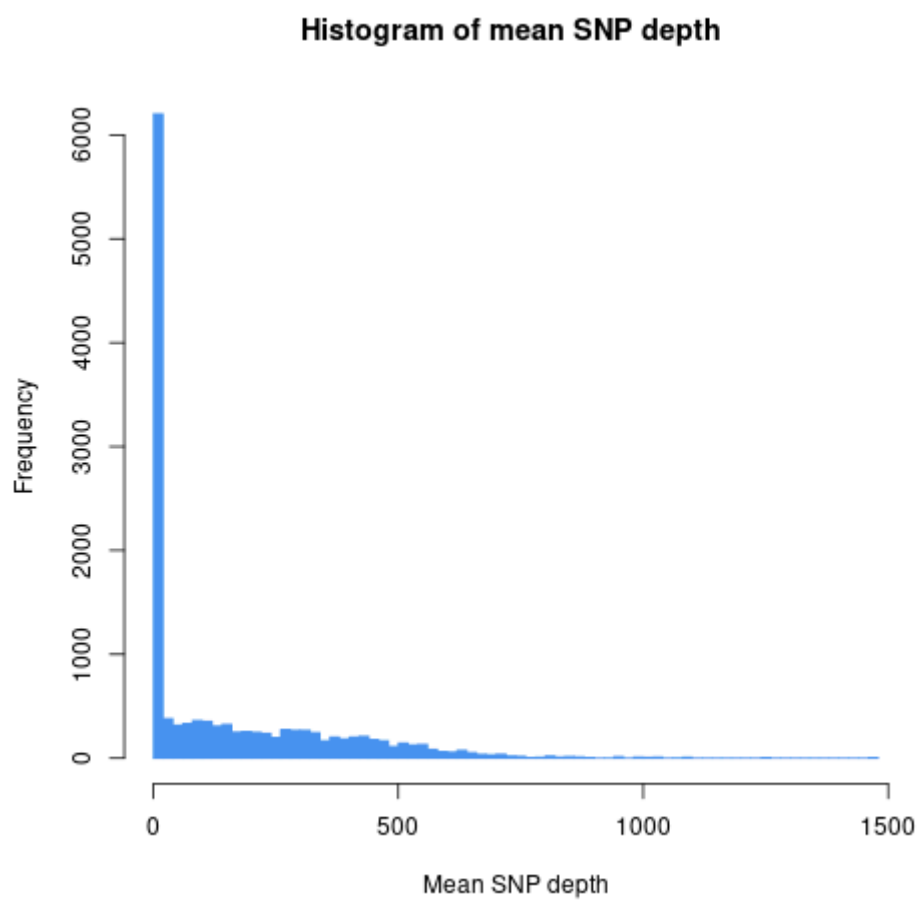

**Suppl. Table S1.** *Zea* seed accessions screened in this study

| Country origin      | Host varieties            | No. Acc. screened | No. Acc. where <i>S. zeae</i> isolated |
|---------------------|---------------------------|-------------------|----------------------------------------|
| Mexico              | <i>Zea m. mexicana</i>    | 36                | 19                                     |
| Mexico              | <i>Zea m. parviglumis</i> | 55                | 16                                     |
| Mexico              | <i>Zea m. mays</i>        | 46                | 9                                      |
| Colombia            | <i>Zea m. mays</i>        | 14                | 4                                      |
| USA                 | <i>Zea m. mays</i>        | 40                | 4                                      |
| Mexico              | <i>Zea diploperennis</i>  | 5                 | 2                                      |
| Venezuela           | <i>Zea m. mays</i>        | 2                 | 1                                      |
| Barbados            | <i>Zea m. mays</i>        | 1                 | 1                                      |
| Chile               | <i>Zea m. mays</i>        | 1                 | 1                                      |
| Cuba                | <i>Zea m. mays</i>        | 1                 | 1                                      |
| Lebanon             | <i>Zea m. mays</i>        | 1                 | 1                                      |
| Mali                | <i>Zea m. mays</i>        | 1                 | 1                                      |
| Morocco             | <i>Zea m. mays</i>        | 1                 | 1                                      |
| Uruguay             | <i>Zea m. mays</i>        | 1                 | 1                                      |
| Egypt               | <i>Zea m. mays</i>        | 2                 | 1                                      |
| Ethiopia            | <i>Zea m. mays</i>        | 2                 | 1                                      |
| France              | <i>Zea m. mays</i>        | 2                 | 1                                      |
| Poland              | <i>Zea m. mays</i>        | 2                 | 1                                      |
| Soviet Union        | <i>Zea m. mays</i>        | 2                 | 1                                      |
| Thailand            | <i>Zea m. mays</i>        | 2                 | 1                                      |
| Argentina           | <i>Zea m. mays</i>        | 3                 | 1                                      |
| Austria             | <i>Zea m. mays</i>        | 3                 | 1                                      |
| Dominican           | <i>Zea m. mays</i>        | 3                 | 1                                      |
| Japan               | <i>Zea m. mays</i>        | 3                 | 1                                      |
| Brazil              | <i>Zea m. mays</i>        | 4                 | 1                                      |
| China               | <i>Zea m. mays</i>        | 5                 | 1                                      |
| Guatemala           | <i>Zea m. mays</i>        | 6                 | 1                                      |
| Peru                | <i>Zea m. mays</i>        | 12                | 1                                      |
| Mexico              | <i>Zea perennis</i>       | 2                 | 1                                      |
| Afghanistan         | <i>Zea m. mays</i>        | 3                 | 0                                      |
| Albania             | <i>Zea m. mays</i>        | 1                 | 0                                      |
| Algeria             | <i>Zea m. mays</i>        | 2                 | 0                                      |
| Angola              | <i>Zea m. mays</i>        | 2                 | 0                                      |
| Antigua and Barbuda | <i>Zea m. mays</i>        | 1                 | 0                                      |
| Australia           | <i>Zea m. mays</i>        | 3                 | 0                                      |
| Azerbaijan          | <i>Zea m. mays</i>        | 1                 | 0                                      |
| Bolivia             | <i>Zea m. mays</i>        | 2                 | 0                                      |
| Botswana            | <i>Zea m. mays</i>        | 1                 | 0                                      |
| Bulgaria            | <i>Zea m. mays</i>        | 1                 | 0                                      |
| Canada              | <i>Zea m. mays</i>        | 1                 | 0                                      |
| Ecuador             | <i>Zea m. mays</i>        | 1                 | 0                                      |
| Eritrea             | <i>Zea m. mays</i>        | 1                 | 0                                      |

|                       |                           |    |   |
|-----------------------|---------------------------|----|---|
| Georgia               | <i>Zea m. mays</i>        | 2  | 0 |
| Germany               | <i>Zea m. mays</i>        | 2  | 0 |
| Hungary               | <i>Zea m. mays</i>        | 2  | 0 |
| India                 | <i>Zea m. mays</i>        | 7  | 0 |
| Indonesia             | <i>Zea m. mays</i>        | 3  | 0 |
| Iran                  | <i>Zea m. mays</i>        | 2  | 0 |
| Israel                | <i>Zea m. mays</i>        | 2  | 0 |
| Italy                 | <i>Zea m. mays</i>        | 3  | 0 |
| Jordan                | <i>Zea m. mays</i>        | 1  | 0 |
| Kazakhstan            | <i>Zea m. mays</i>        | 1  | 0 |
| Kenya                 | <i>Zea m. mays</i>        | 1  | 0 |
| Macedonia             | <i>Zea m. mays</i>        | 1  | 0 |
| Moldova               | <i>Zea m. mays</i>        | 1  | 0 |
| Nepal                 | <i>Zea m. mays</i>        | 1  | 0 |
| Netherlands           | <i>Zea m. mays</i>        | 2  | 0 |
| New Zealand           | <i>Zea m. mays</i>        | 46 | 0 |
| Nicaragua             | <i>Zea m. mays</i>        | 2  | 0 |
| Nicaragua             | <i>Zea nicarraguensis</i> | 1  | 0 |
| Pakistan              | <i>Zea m. mays</i>        | 2  | 0 |
| Paraguay              | <i>Zea m. mays</i>        | 1  | 0 |
| Philippines           | <i>Zea m. mays</i>        | 3  | 0 |
| Portugal              | <i>Zea m. mays</i>        | 3  | 0 |
| Romania               | <i>Zea m. mays</i>        | 2  | 0 |
| Serbia and Montenegro | <i>Zea m. mays</i>        | 2  | 0 |
| South Africa          | <i>Zea m. mays</i>        | 3  | 0 |
| Spain                 | <i>Zea m. mays</i>        | 2  | 0 |
| USA                   | <i>Zea m. mexicana</i>    | 7  | 0 |

---
